# Supplementary material for: A distinct novel approach for the synthesis of 3-indolyl-methanamines starting from indoles, aldehydes and nitrobenzenes in water
Source: Royal Society of Chemistry journal article supplement (doi:10.1039/c3ra41131a), 2013-01-01
Supplement: c3ra41131a.pdf [file c3ra41131a.pdf]

## Electronic Supplementary Information

### **A distinct novel approach for the synthesis of 3-indolyl-methanamines in water.**

Biswanath Das,\* Jayprakash Narayan Kumar, Avula Satya Kumar,  
Gandham Satyalakshmi and Digambar Balaji Shinde

*Organic Chemistry Division-I,*

*Indian Institute of Chemical Technology, Hyderabad 500 007, India*

*E-mail: [biswanathdas@yahoo.com](mailto:biswanathdas@yahoo.com)*

## Contents

Copies of  $^1\text{H}$ ,  $^{13}\text{C}$  NMR and ESIMS spectra

Copies of  $^1\text{H}$ ,  $^{13}\text{C}$  NMR and ESIMS Spectra of compounds (**4Aa-4E**):

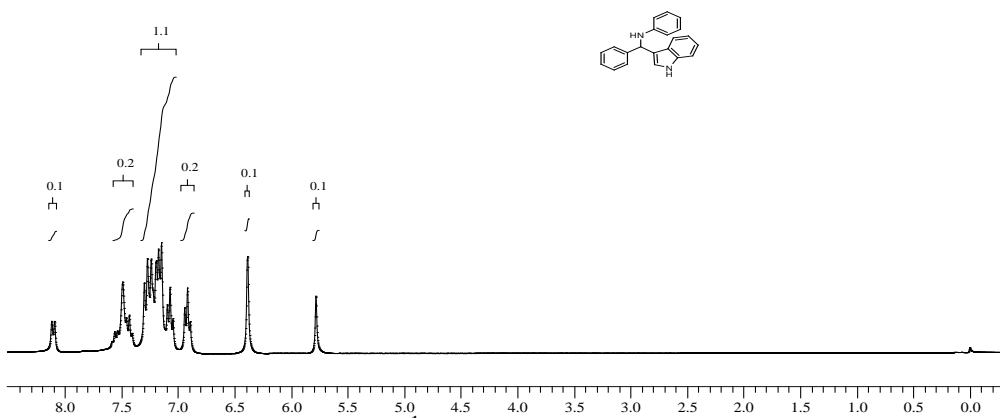

Fig. 1  $^1\text{H}$  NMR of compound **4Aa**

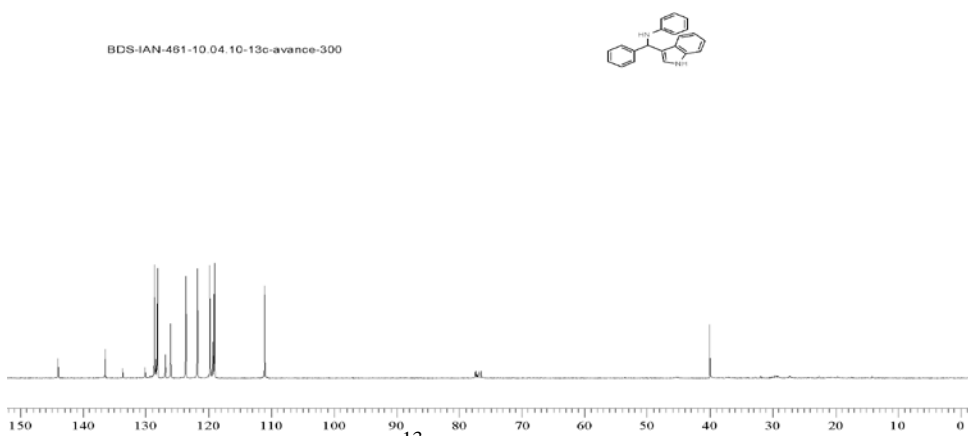

Fig. 2  $^{13}\text{C}$  NMR of compound **4Aa**

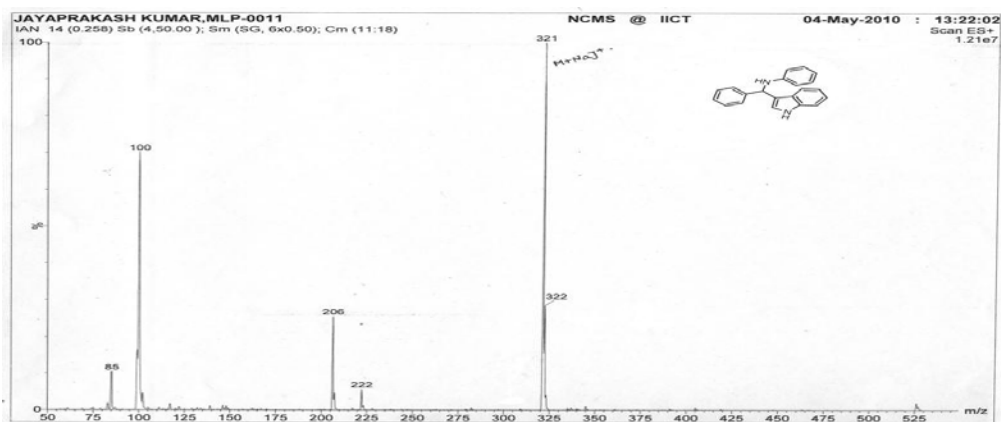

Fig. 3 ESI Mass Spectra of compound **4Aa**

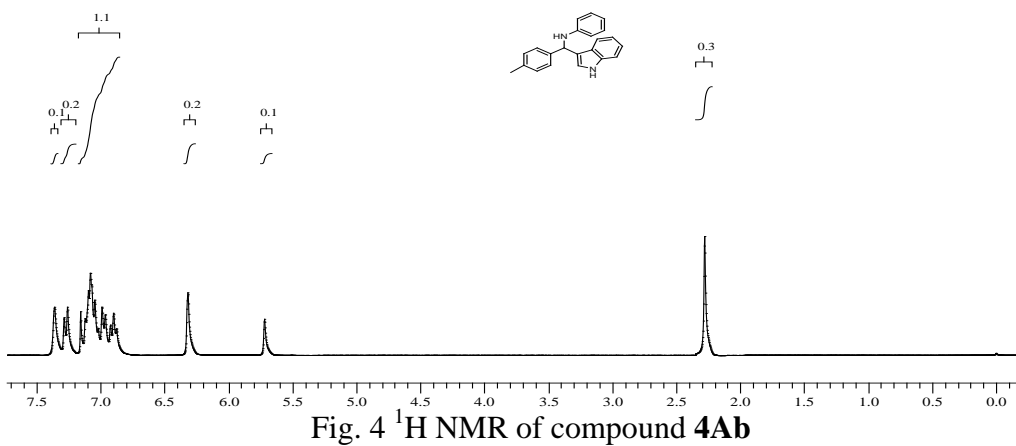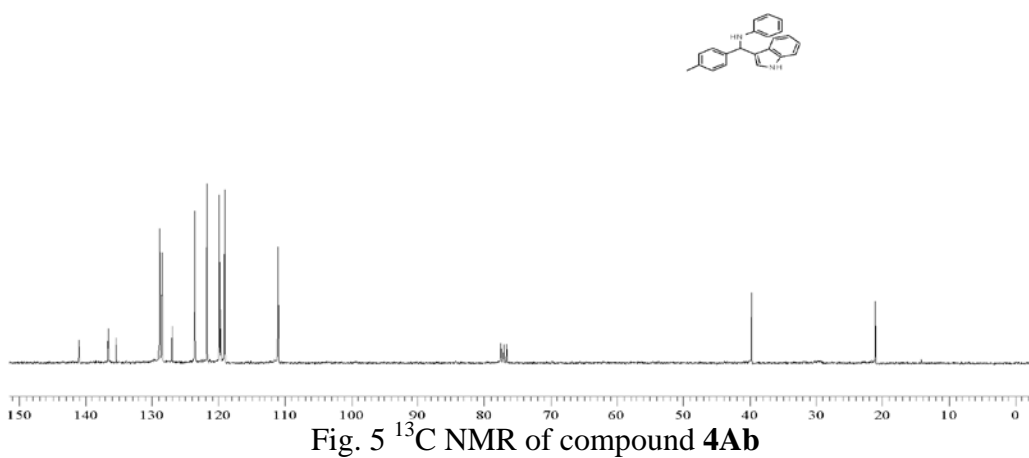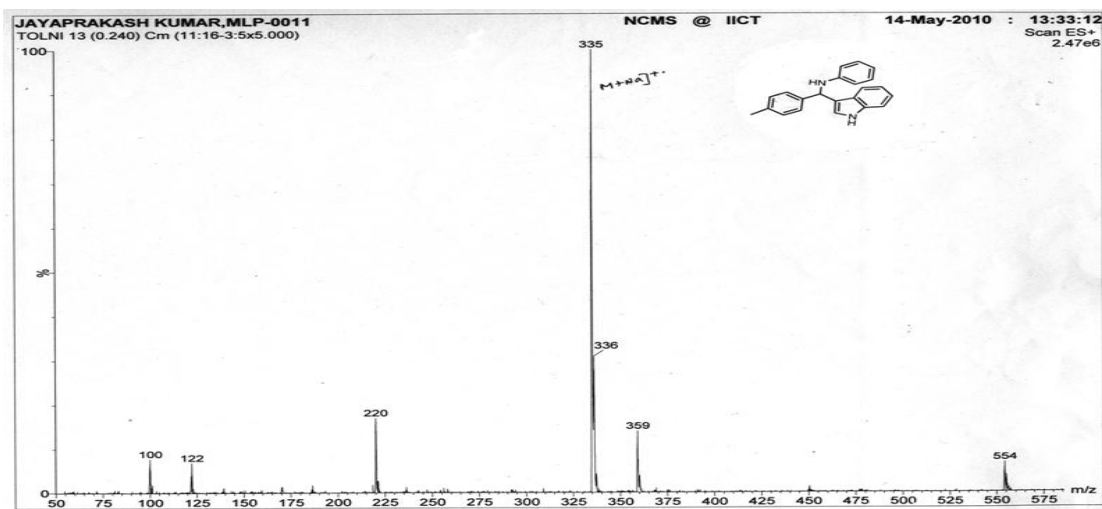

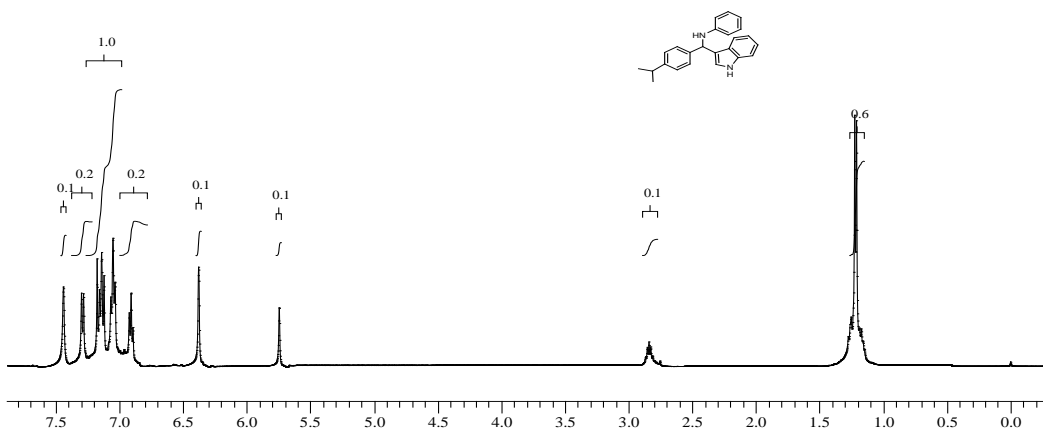

Fig. 7 <sup>1</sup>H NMR of compound 4Ac

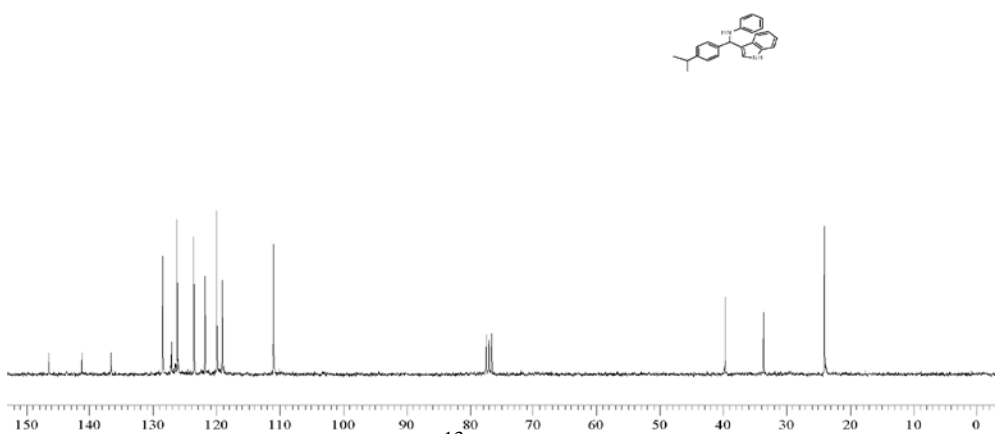

Fig. 8 <sup>13</sup>C NMR of compound 4Ac

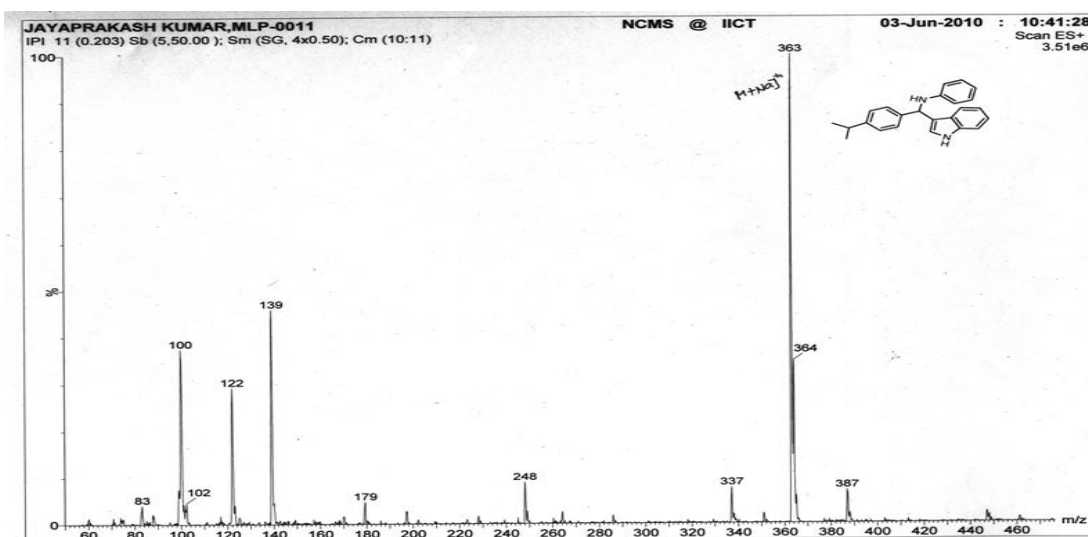

Fig. 9 ESI Mass Spectra of compound 4Ac

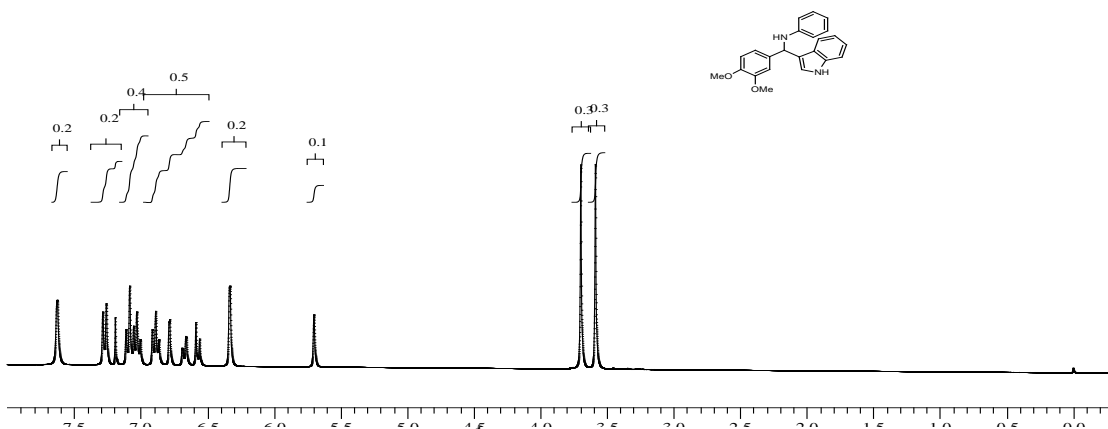

Fig. 10 <sup>1</sup>H NMR of compound 4Ad

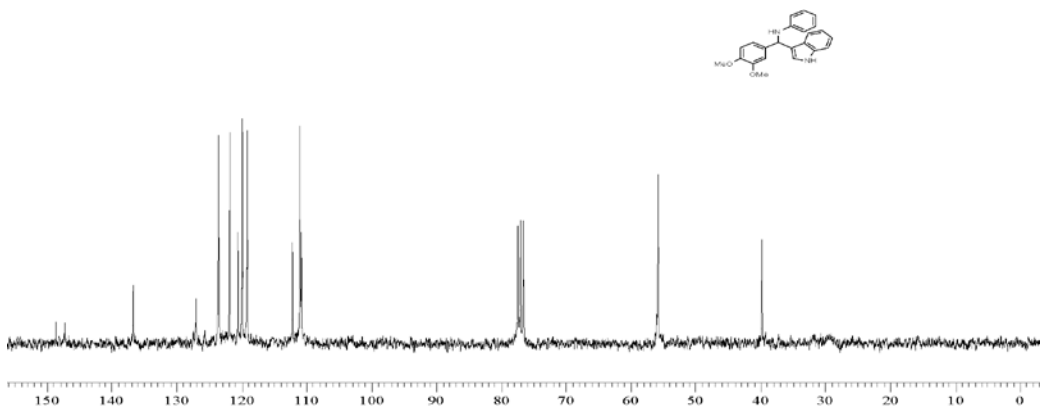

Fig. 11 <sup>13</sup>C NMR of compound 4Ad

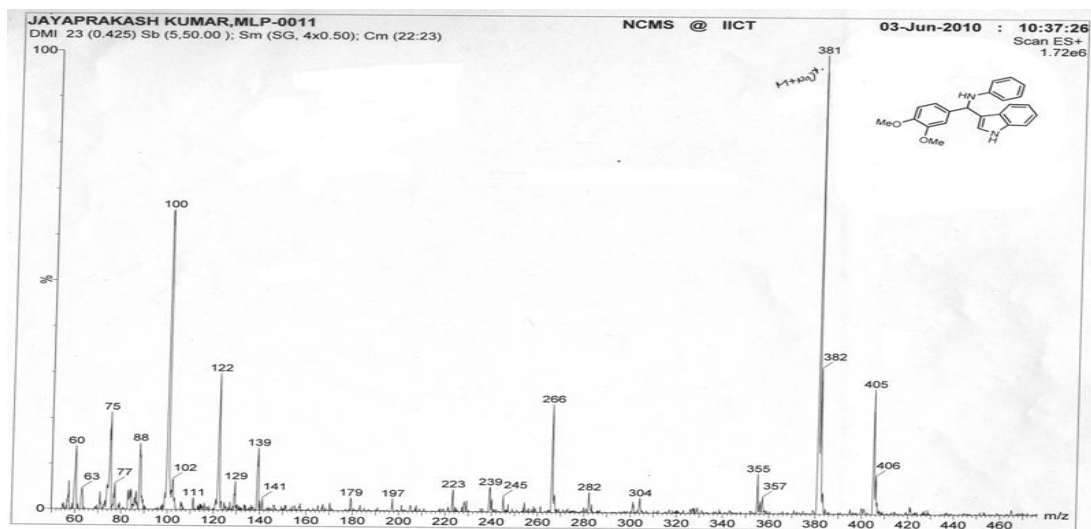

Fig. 12 ESI Mass Spectra of compound 4Ad

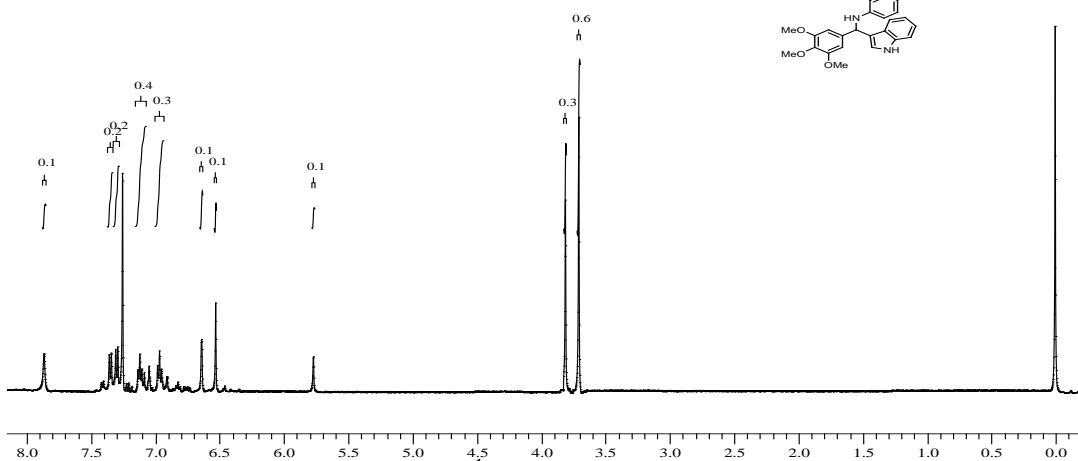

Fig. 13 <sup>1</sup>H NMR of compound 4Ae

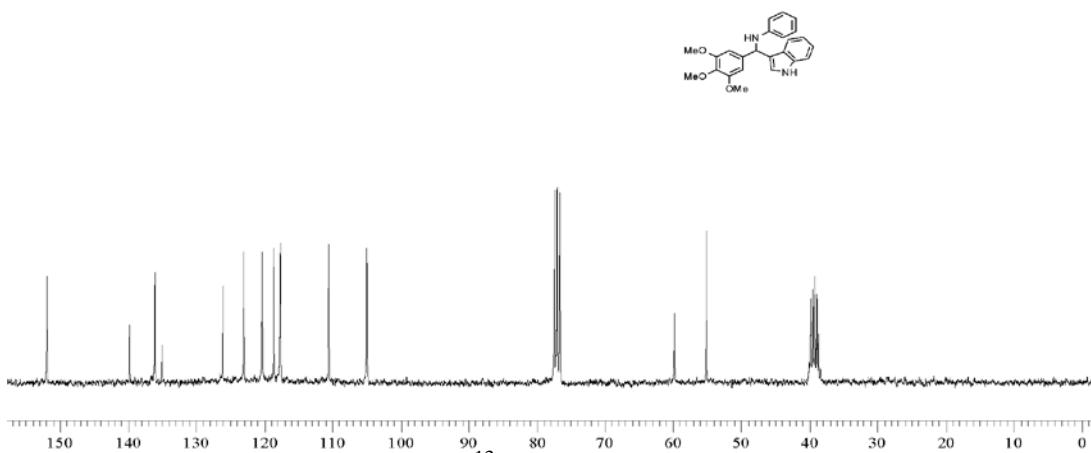

Fig. 14 <sup>13</sup>C NMR of compound 4Ae

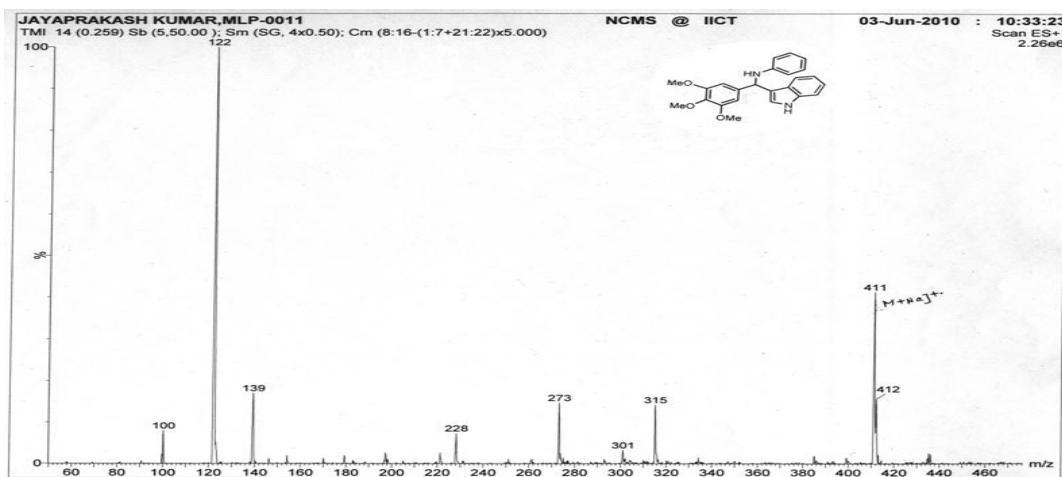

Fig. 15 ESI Mass Spectra of compound 4Ae

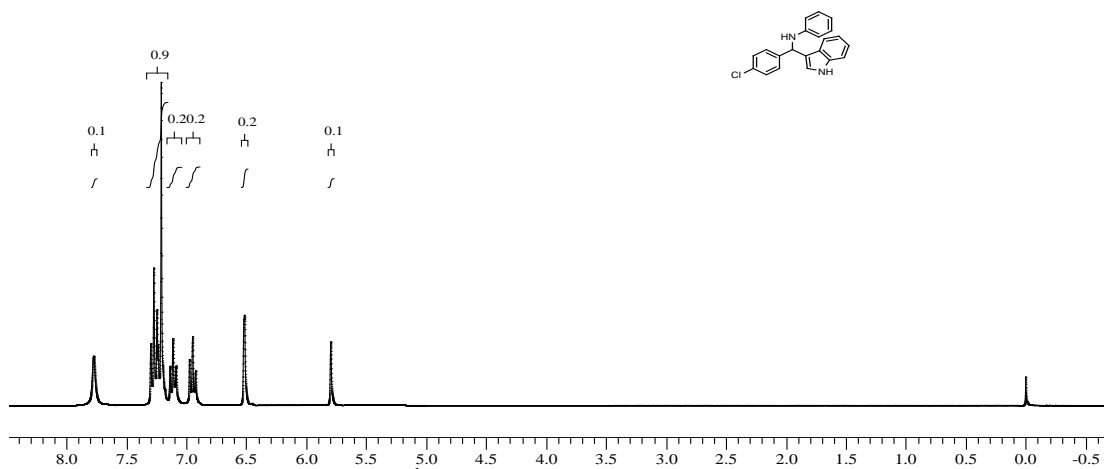

Fig. 16 <sup>1</sup>H NMR of compound 4Af

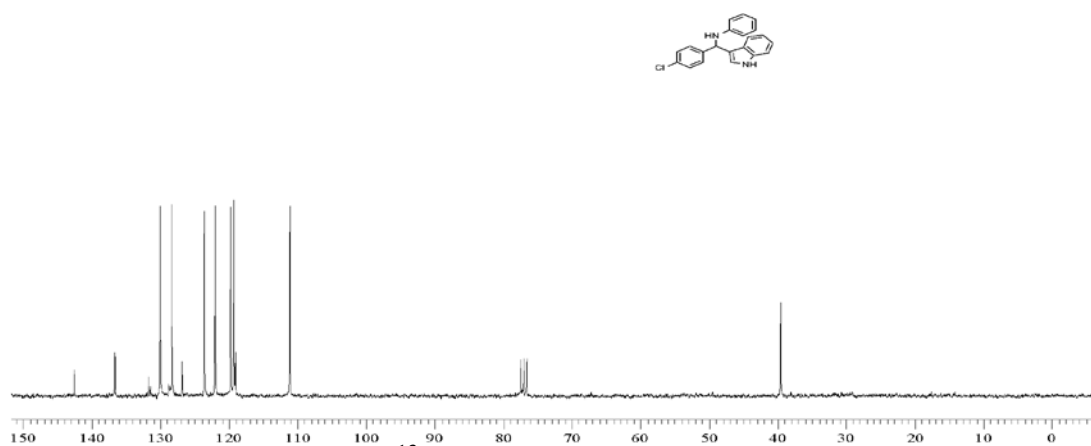

Fig. 17 <sup>13</sup>C NMR of compound 4Af

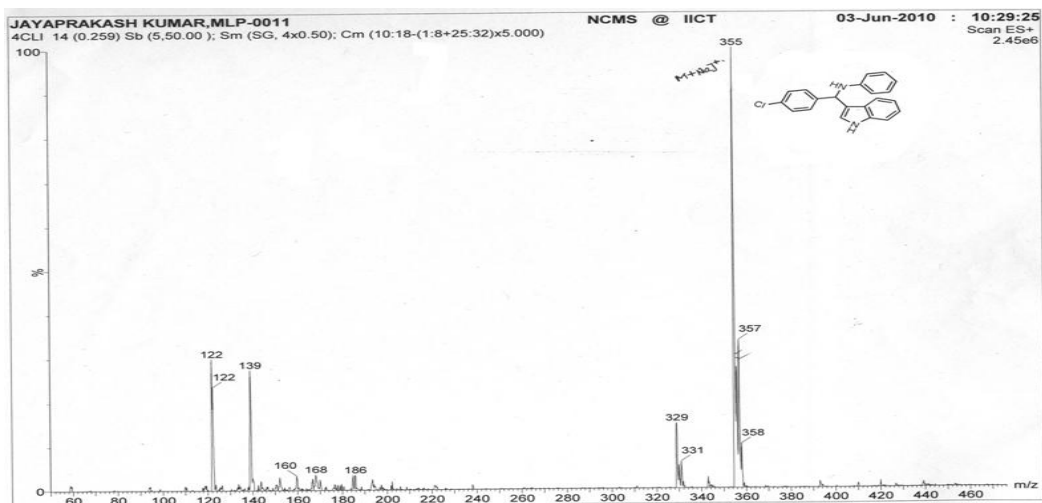

Fig. 18 ESI Mass Spectra of compound 4Af



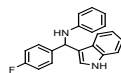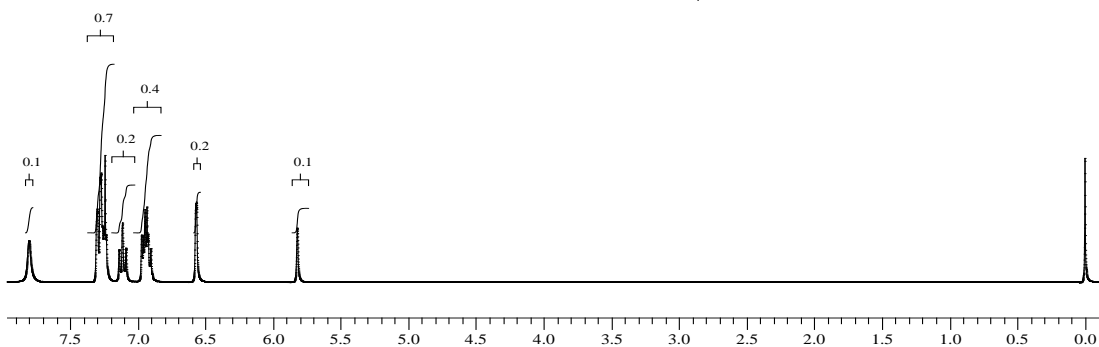

Fig. 19  $^1\text{H}$  NMR of compound 4Ag

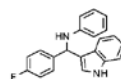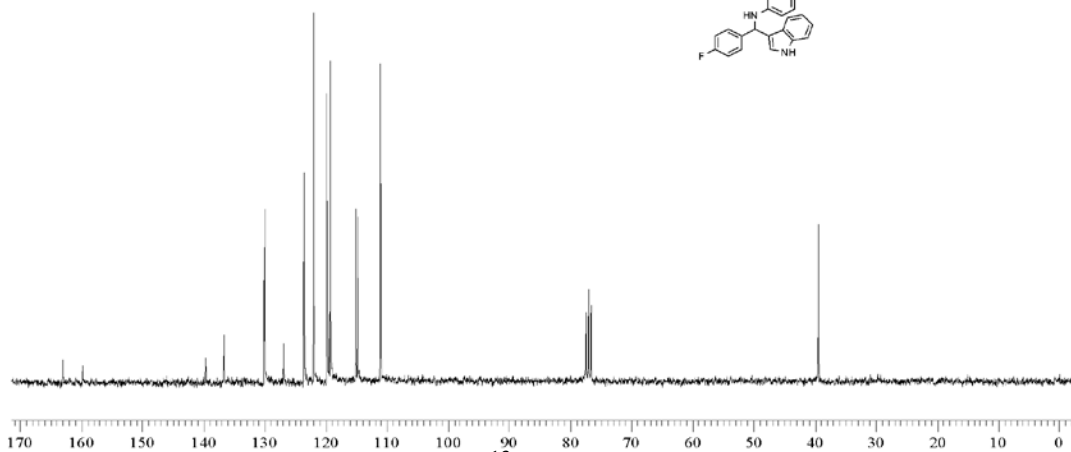

Fig. 20  $^{13}\text{C}$  NMR of compound 4Ag

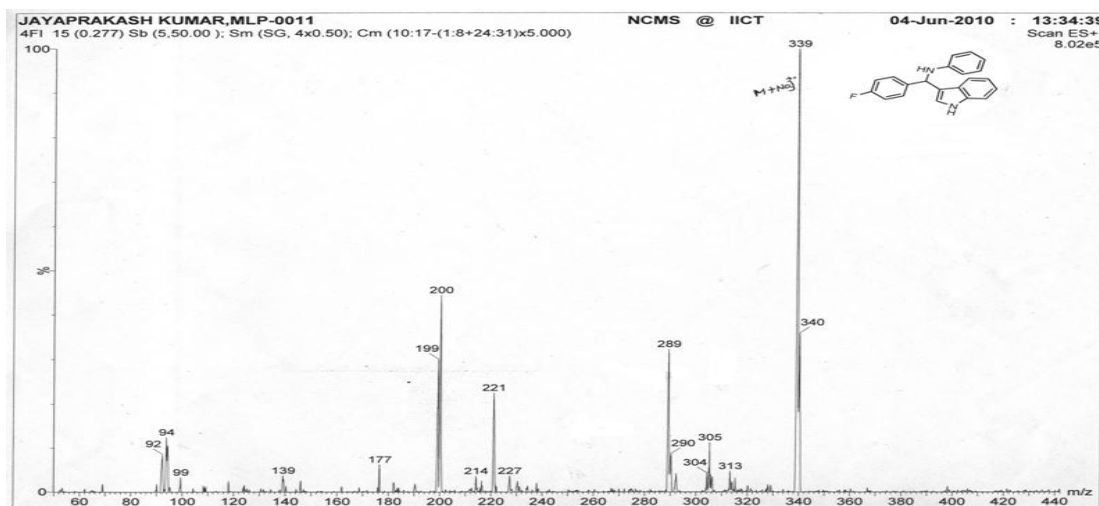

Fig. 21 ESI Mass Spectra of compound 4Ag

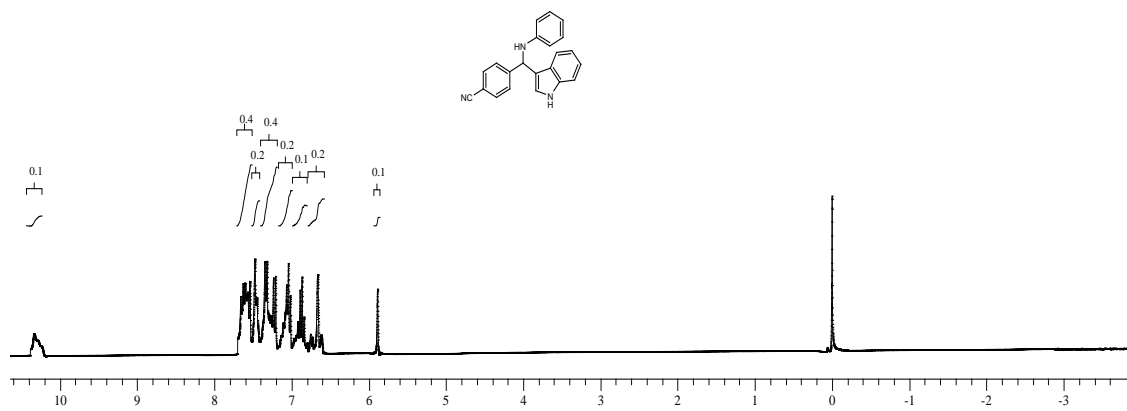

Fig. 22 <sup>1</sup>H NMR of compound 4Ah

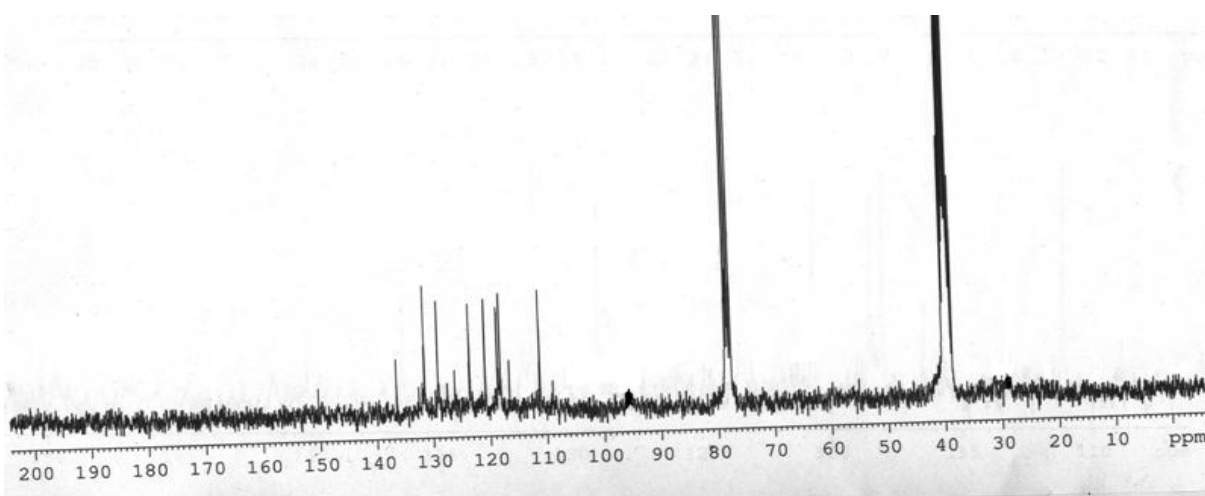

Fig. 23 <sup>13</sup>C NMR of compound 4Ah

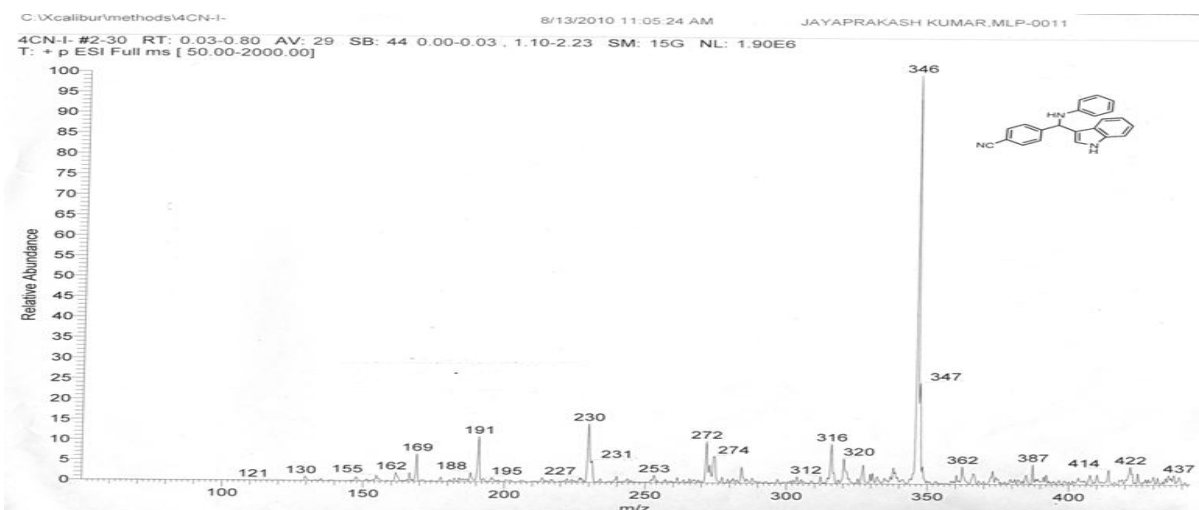

Fig. 24 ESI Mass Spectra of compound 4Ah

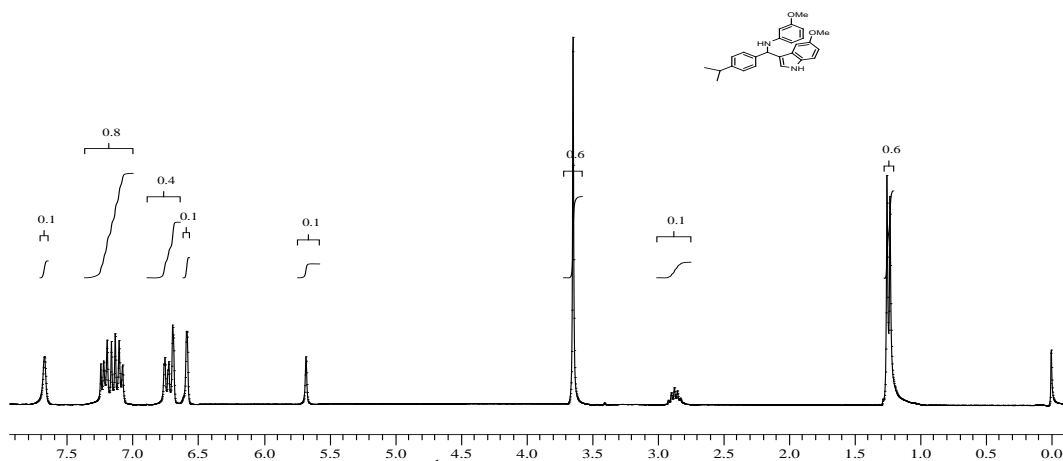

Fig. 25 <sup>1</sup>H NMR of compound 4Ai

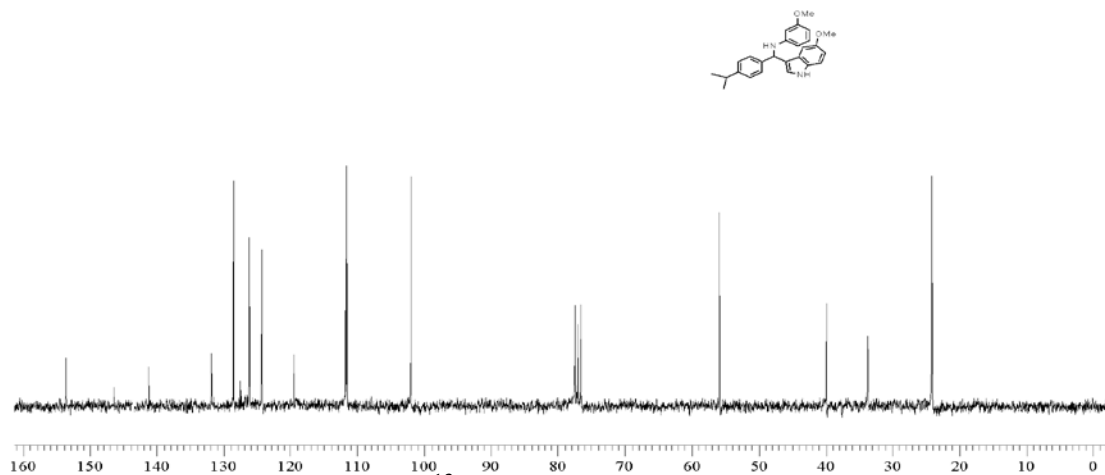

Fig. 26 <sup>13</sup>C NMR of compound 4Ai

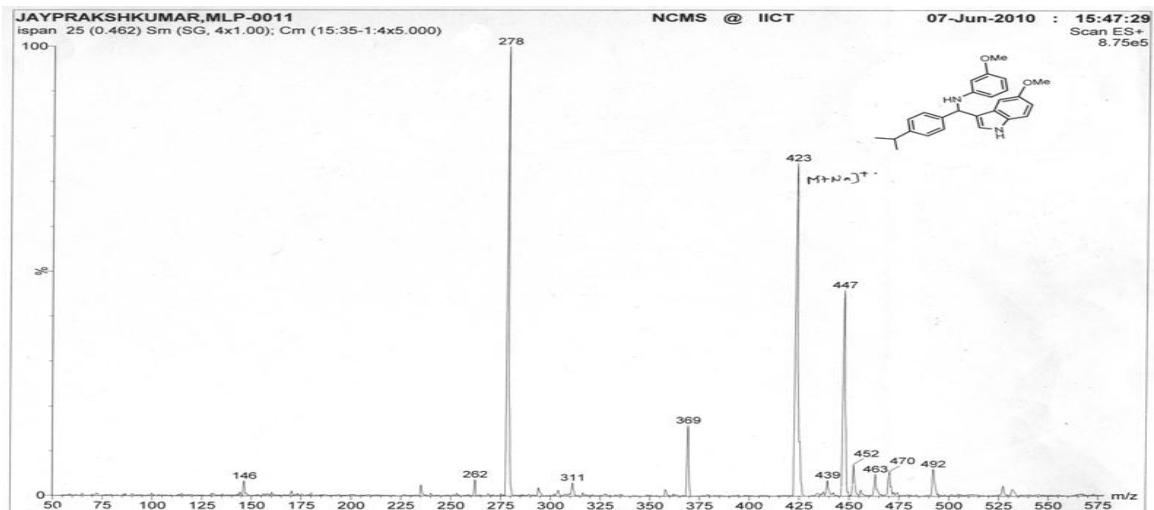

Fig. 27 ESI Mass Spectra of compound 4Ai

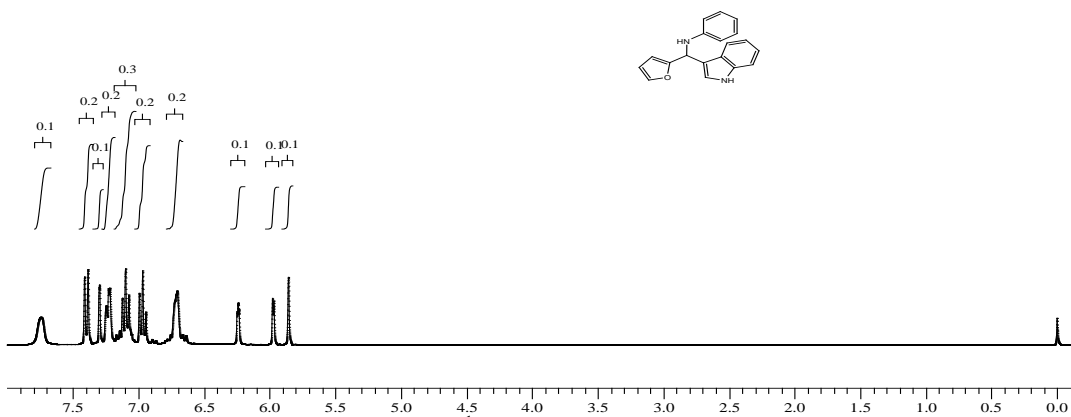

Fig. 28 <sup>1</sup>H NMR of compound 4B

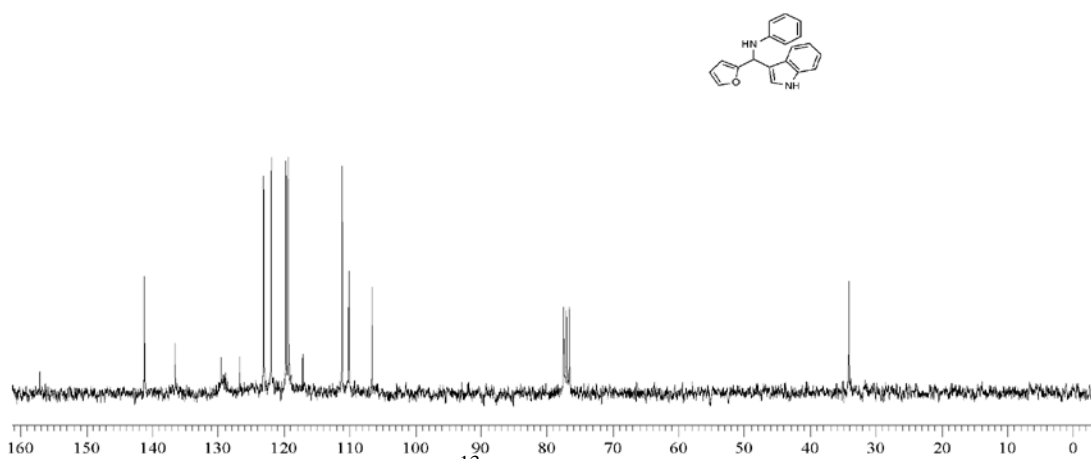

Fig. 29 <sup>13</sup>C NMR of compound 4B

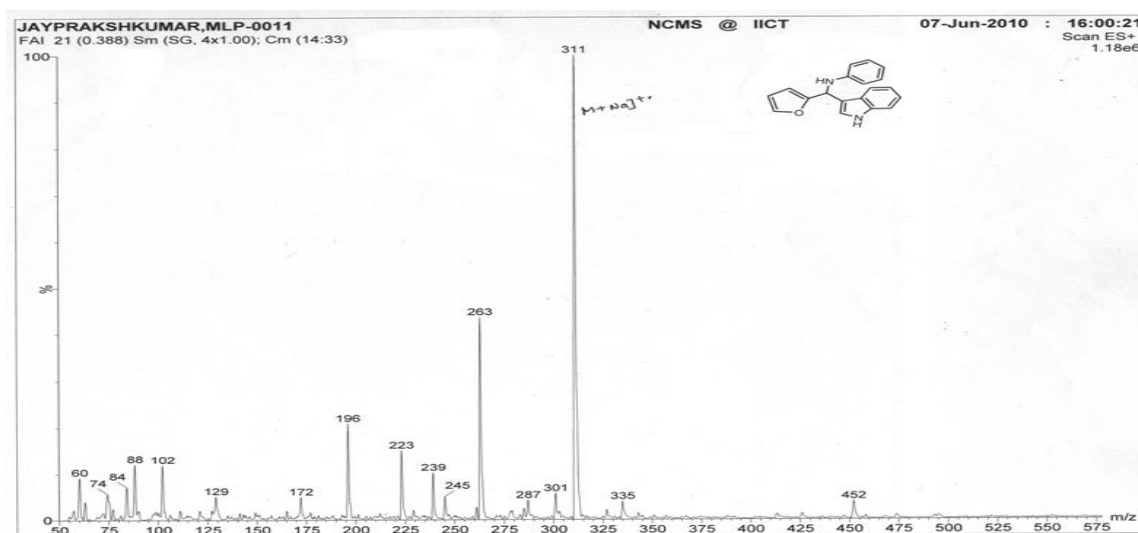

Fig. 30 ESI Mass Spectra of compound 4B

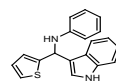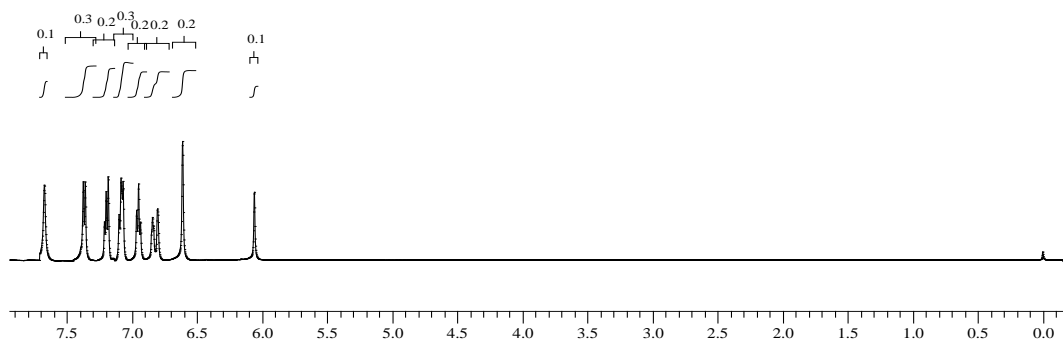

Fig. 31  $^1\text{H}$  NMR of compound 4C

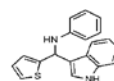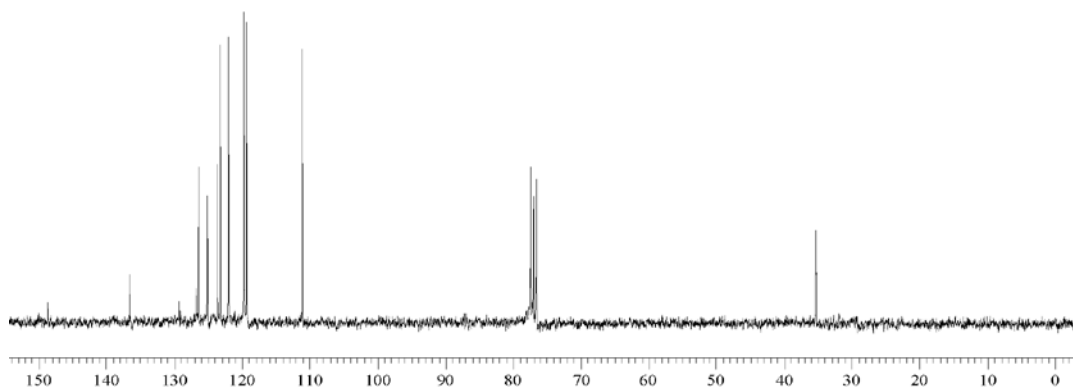

Fig. 32  $^{13}\text{C}$  NMR of compound 4C

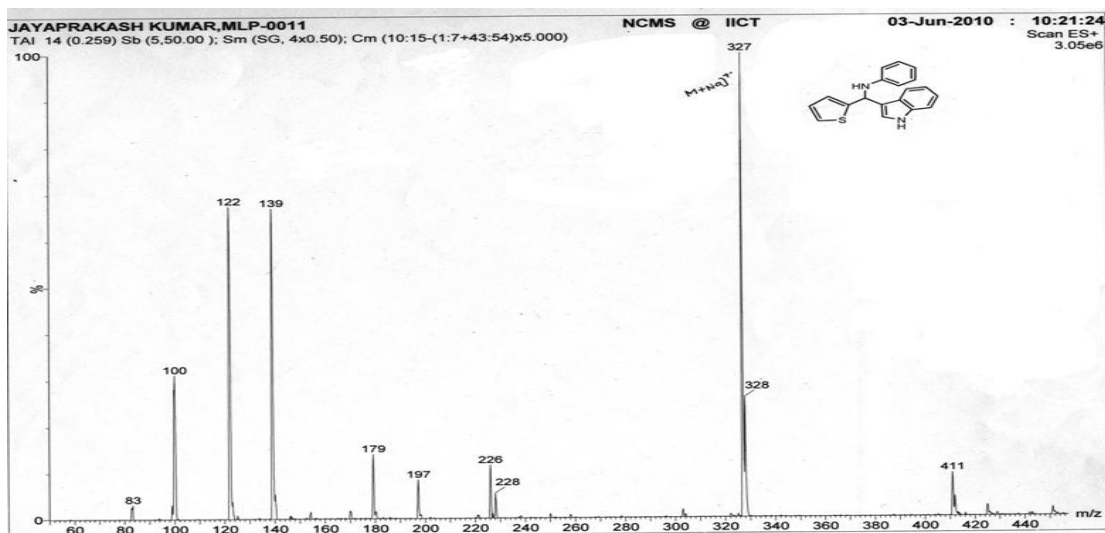

Fig. 33 ESI Mass Spectra of compound 4C

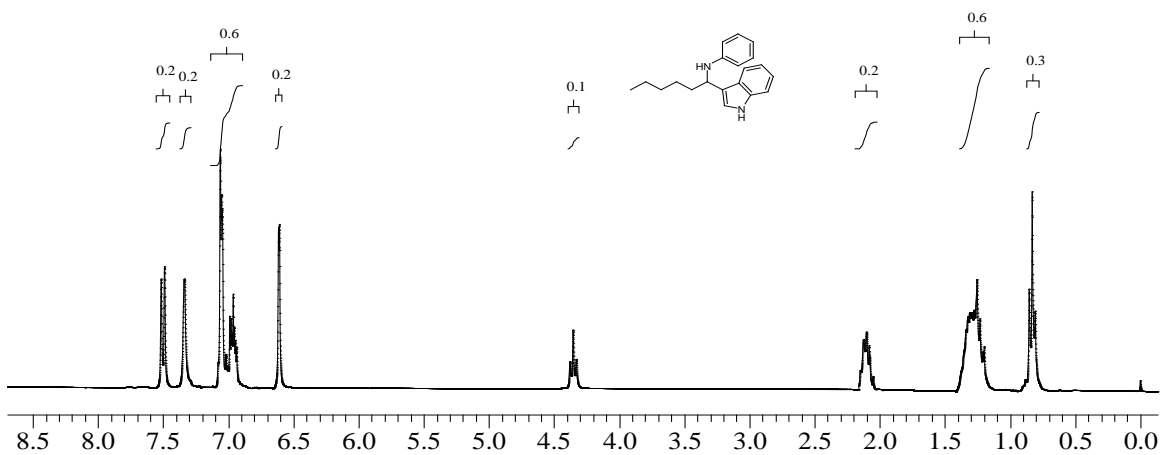

Fig. 34 <sup>1</sup>H NMR of compound 4D

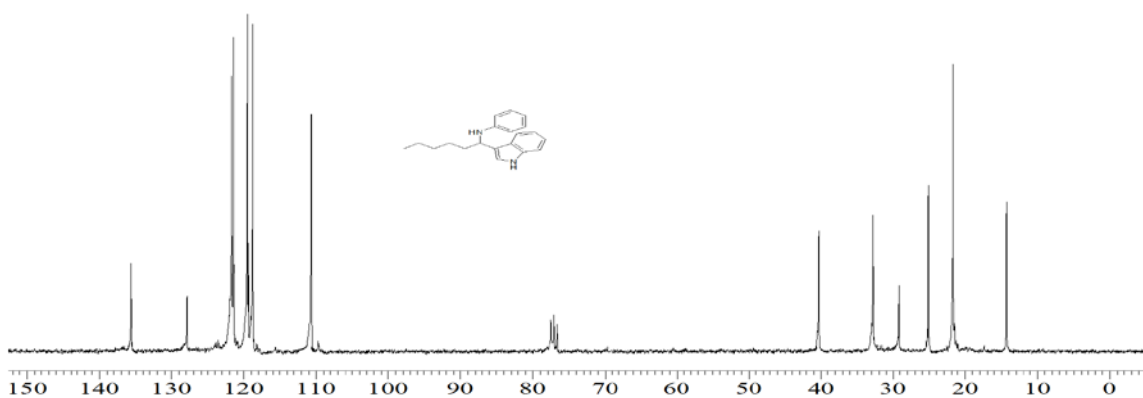

Fig. 35 <sup>13</sup>C NMR of compound 4D

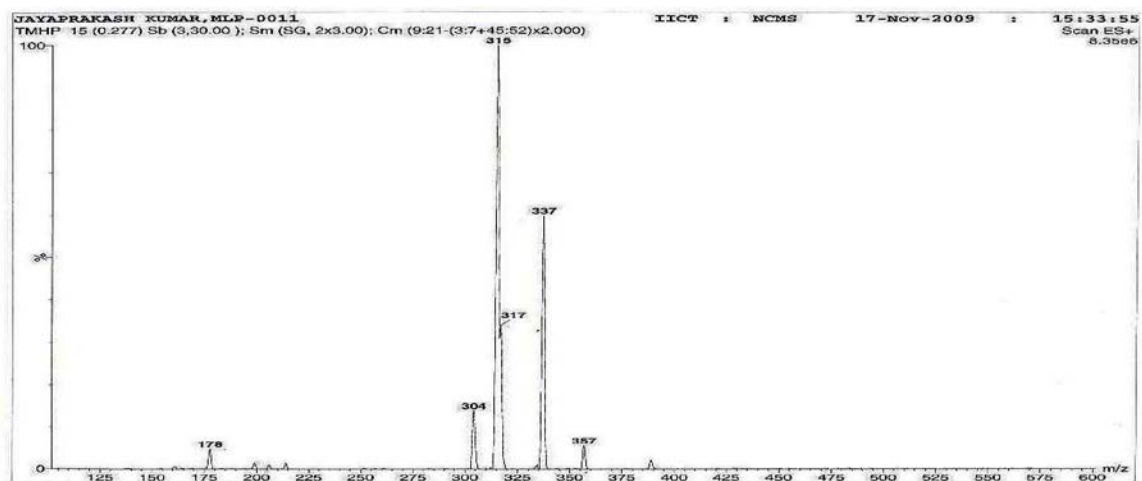

Fig. 36 ESI Mass Spectra of compound 4D

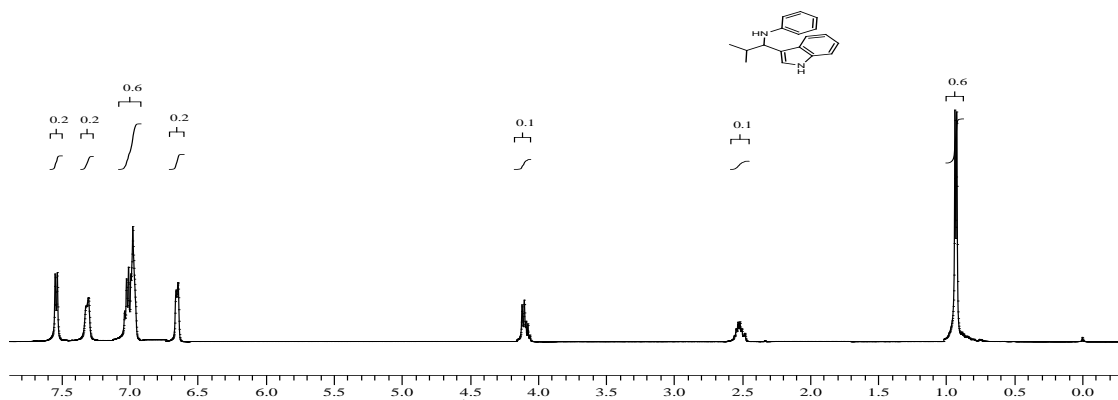

Fig. 37 <sup>1</sup>H NMR of compound **4E**

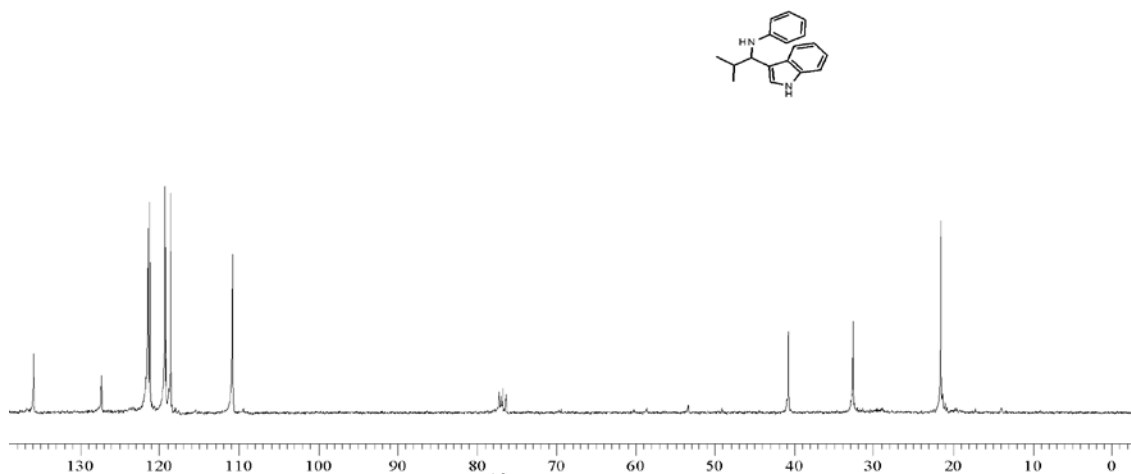

Fig. 38 <sup>13</sup>C NMR of compound **4E**

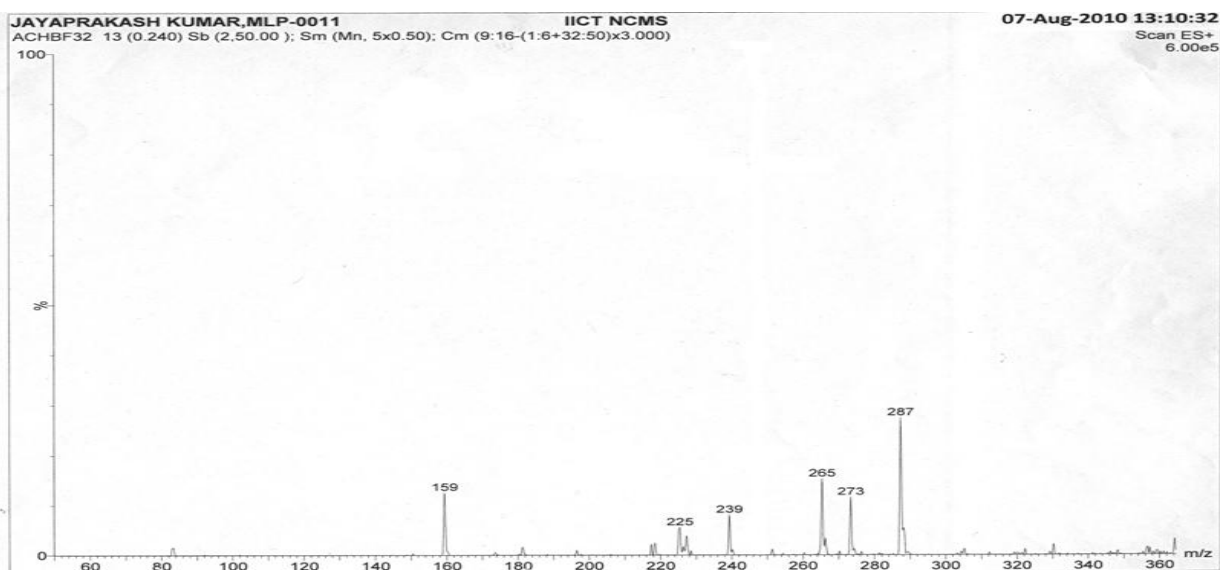

Fig. 39 ESI Mass Spectra of compound **4E**
